## **The dimerized pentraxin-like domain of the adhesion G protein-coupled receptor 112 (ADGRG4) suggests function in sensing mechanical forces**

Björn Kieslich<sup>1,2</sup>, Jana Brendler<sup>3</sup>, Albert Ricken<sup>3</sup>, Torsten Schöneberg<sup>2\*</sup>, Norbert Sträter<sup>1\*</sup>

<sup>1</sup>Institute of Bioanalytical Chemistry, Center for Biotechnology and Biomedicine, Leipzig University, 04103 Leipzig, Germany

<sup>2</sup>Rudolf Schönheimer Institute of Biochemistry, Medical Faculty, Leipzig University, 04103 Leipzig, Germany

<sup>3</sup>Institute of Anatomy, Medical Faculty, Leipzig University, 04103 Leipzig, Germany

\*Correspondences should be addressed to:

Norbert Sträter, Institute of Bioanalytical Chemistry, Center for Biotechnology and Biomedicine, Leipzig University, 04103 Leipzig, Germany, e-mail: [strater@bbz.uni-leipzig.de](mailto:strater@bbz.uni-leipzig.de)

Torsten Schöneberg, Rudolf Schönheimer Institute of Biochemistry, Medical Faculty, Leipzig University, Johannisallee 30, 04103 Leipzig, Germany, e-mail: [schoberg@medizin.uni-leipzig.de](mailto:schoberg@medizin.uni-leipzig.de)

Keywords: adhesion G protein-coupled receptor, pentraxin, X-ray structure, signal transduction

## Abstract

Adhesion G protein-coupled receptors (aGPCRs) feature large extracellular regions (ECRs) with modular domains that often resemble protein classes of various function. The pentraxin (PTX) domain, which is predicted by sequence homology within the ECR of four different aGPCR members, is well known to form pentamers and other oligomers. Oligomerization of GPCRs is frequently reported and mainly driven by interactions of the seven-transmembrane region and N- or C-termini. While the functional importance of dimers is well-established for some class C GPCRs, relatively little is known about aGPCR multimerization. Here, we showcase the example of ADGRG4, an orphan aGPCR that possesses a PTX-like domain at its very N-terminal tip, followed by an extremely long stalk containing serine-threonine repeats. Using x-ray crystallography and biophysical methods we determined the structure of this unusual PTX-like domain and provide experimental evidence for a homodimer equilibrium of this domain which is  $\text{Ca}^{2+}$ -independent and driven by intermolecular contacts that differ vastly from the known soluble PTXs. The formation of this dimer seems to be conserved in mammalian ADGRG4 indicating functional relevance. Our data alongside of theoretical considerations lead to the hypothesis that ADGRG4 acts as an *in vivo* sensor for shear forces in enterochromaffin and Paneth cells of the small intestine.

## Introduction

Although it is generally accepted that G protein-coupled receptors (GPCRs) exist as monomers there is convincing evidence that some GPCRs can also form dimers and even higher-order oligomers. Members of the metabotropic glutamate receptor-like GPCRs (class C), are well-known examples for forming stable homo- and heterodimers (Møller et al. 2018). Moreover, transient oligomerization was frequently reported for rhodopsin-like (class A) receptors (Walsh et al. 2018; Milligan et al. 2019). In class B, the secretin receptor was one of the first members for which dimerization was

described (Ding et al. 2002), yet other reports about homo- and heterooligomerization followed (Ng and Chow 2015). Within the class B, adhesion GPCRs (aGPCRs) form a structurally separate receptor cluster comprising 33 members in the human genome which can be further subdivided into nine families (Hamann et al. 2015). Here, homo- and heterodimerization was shown in *trans* and *cis*, mediated via their large extracellular regions (ECRs). For example, members ADGRC1–3 undergo homophilic *trans* interactions (Shima et al. 2007; Nishimura et al. 2012). ADGRE5 heterodimerizes with lysophosphatidic acid receptor 1 in prostate and thyroid cancer cell lines and thus amplifies RhoA activation (Ward et al. 2011; Ward et al. 2013).

There is a backlog demand for fundamental research on the aGPCR class, as the majority of members are still considered orphan receptors. However, there is an evident involvement of aGPCRs in various developmental and physiological processes and inherited diseases (Schöneberg and Liebscher 2021). Members of the aGPCR class often stand out with extraordinary long ECRs, which comprise module-like domain arrangements and many glycans. The so-called pentraxin (PTX)-like domain is one of these extracellular domains (ECDs). Sequence homology predicts PTX-like domains to be present within the ECRs of the aGPCR members ADGRD1 (GPR133), ADGRD2 (GPR144), ADGRG4 (GPR112), and ADGRG6 (GPR126) (Hamann et al. 2015). However, knowledge is lacking about the function of this domain within the ECR of aGPCRs. The term “pentraxin” is inevitably linked to the homopentamerization of the archetypal serum proteins C-reactive protein (CRP) and serum amyloid component P (SAP). Indeed, pentamerization and other oligomeric states beyond dimers have been reported for other pentraxins (Kirkpatrick et al. 2000; Inforzato et al. 2008). Therefore, the question arises whether PTX-like domains in ECRs of aGPCRs oligomerize in a similar fashion as their soluble counterparts. Furthermore, CRP and SAP feature distinct  $\text{Ca}^{2+}$ -binding sites that

are mandatory for ligand binding and, in case of CRP, for pentamerization (Pepys et al. 1977; Pepys 2018). Despite being distinct protein classes, the basic  $\beta$ -sandwich fold of the pentraxins is also shared by other domain classes. Specifically, the laminin G-like (LG) domains exhibit a high structural resemblance to PTXs, despite a low sequence similarity. A more distant structural homology is also found for legume lectins, galectins and bacterial  $\beta$ -glucanases (Rudenko et al. 2001). The laminin  $\alpha$  subunit possesses five LG domains at its C-terminus (LG1–5), which contain the major adhesive sites of laminins in the basal membrane (Hohenester and Yurchenco 2013; Hohenester 2019). After discovery in the laminin  $\alpha$  subunit (Hohenester et al. 1999), LG domains were identified in other proteins of diverse biological function (Rudenko et al. 2001). Their function was linked to e.g.  $\alpha$ -dystroglycan binding and similar binding modes were suggested for the LG3 domains of the heparan sulfate proteoglycans agrin (Stetefeld et al. 2004) and perlecan (Le et al. 2011). In neurexins, LG domains mediate a  $\text{Ca}^{2+}$ -dependent interaction with neuroligin (Chen et al. 2008), forming a synaptic adhesion complex. LG domains were identified in the sex-hormone binding globulin (SHBG) which represents a soluble steroid hormone transporter protein (Grishkovskaya et al. 2002). This multifaceted interaction spectrum of LG domains led to their alternative naming “laminin-neurexin-SHBG” (LNS) domains (Missler and Südhof 1998).

ADGRG4 (former: GPR112) is an orphan aGPCR which was identified as a specific marker for enterochromaffin cells of the small intestine and neuroendocrine carcinoma cells (Leja et al. 2009). ADGRG4 is an evolutionarily old receptor being present in the genomes of all bony vertebrate classes (Wittlake et al. 2021). Among aGPCRs ADGRG4 is a poorly studied Gs protein-coupled receptor and limited information is available about its physiological relevance yet. Recently, the 7TM domain of ADGRG4 has been structurally characterized using cryo-electron microscopy (Xiao et al.

2022) displaying the same tethered *Stachel* peptide-mediated activation mechanism as for other aGPCRs (Liebscher et al. 2022). With more than 2,700 amino acid residues in its ECR, this receptor presents with one of the largest N-termini within the aGPCR class. However, only three domains are predicted by homology within this huge ECR – the PTX-like domain, the hormone receptor binding motif (HRM), and the GPCR autoproteolysis-inducing (GAIN) domain (Figure 1). The structural analysis of this ECR may provide clues of ADGRG4 function. GAIN and HRM domains of several other aGPCRs have been already structurally characterized by X-ray crystallography (Araç et al. 2012; Salzman et al. 2016; Leon et al. 2020). Because of its peculiar architecture as a highly conserved domain at the tip of a huge probably disordered region, we were interested in the structure of the PTX-like domain (ADGRG4-PTX) to understand its relevance in ADGRG4 function. Our X-ray crystallographic studies of ADGRG4-PTX revealed an overall fold similar to those of other PTX domains. However, ADGRG4-PTX homodimerizes  $\text{Ca}^{2+}$ -independently, as also supported by SAXS measurements, and significantly differs in distinct structural features compared to known PTX structures. Our data strongly suggests that ADGRG4 may act as a mechanical force sensor for shear stress or changes in distance.

## Results and Discussion

### Phylogenetic analysis of aGPCR pentraxin-like and laminin-like domains reveals two distinct clusters

There are several PTX-like and LG domains in different soluble and membrane proteins. First, we analyzed their phylogenetic relations of the ADGRG4-PTX by aligning selected orthologous amino acid sequences of PTX-like/LG domains from different proteins and building a maximum likelihood tree. As shown in figure 1B, there are three main clusters as supported by bootstrap analysis – **cluster “PTX”** contains the PTX-like domains of the

neuronal pentraxins NP1 and 2, the neuronal pentraxin receptor (NPR), CRP, SAP, PTX3, PTX4, as well as the aGPCRs ADGRD1, ADGRD2, ADGRG4, and ADGRG6. **Cluster “LG”** comprises the LG/PTX-like domains of neurexin 1 $\alpha$ , laminin  $\alpha$  LG2, and the LG1 and 2 domains of the aGPCRs ADGRC1–3. The third cluster lies in between the two other clusters and is exclusively formed by SHBG orthologs. Within the cluster **PTX**, the PTX-like domain of ADGRG4 clusters with those of ADGRG6 indicating close phylogenetic relation. However, the PTX-like domain of CRP and SAP seems to be more distantly related to the one of ADGRG4 which already indicates some significant structural differences to the prototypical domain. Interestingly, the two LG domains of the ADGRC1–3 independently cluster according to their position within the ECR, regardless of their paralog affiliation. This suggests that the two different LG repeats in ADGRC1–3 fulfill distinct functions.

### **The N-terminus of ADGRG4 represents a conserved $\beta$ -sandwich fold**

For protein crystallization and structural analysis, the cDNA of the PTX-like domain of the human ADGRG4 (residues 1-240, UniProt accession number Q8IZF6-1) was cloned into a mammalian expression vector and transfected for secreted expression into the HEK293S GnTI<sup>-</sup> cell line. The two-step purification (see Methods) yielded the protein in sufficient purity for crystallization (suppl. Fig. S1A). The protein exhibited a double band in a 12%-SDS-PAGE, which collapsed upon treatment with PNGase (suppl. Fig. S1B), indicating a heterogeneous glycosylation state. Crystals of space group C2 were obtained, which were optimized to a size of over 200  $\mu$ m (suppl. Fig. S1C). Residues 26-162 and 176-231 are resolved in the electron density maps. The N-terminal residues 1-25 are the signal peptide and are not present in the secreted protein. The C-terminal residues as well as the loop residues 163-175 have no density, most likely due to flexibility. The crystallographic data revealed a  $\beta$ -sandwich fold (Fig. 2). Six and seven antiparallel  $\beta$ -strands assemble the two  $\beta$ -sheets

A and B, respectively. The designation as "A" and "B" was adopted from the homologous PTX domains of CRP and SAP (Fig. 1B) (Ashton et al. 1997; Pepys 2018). The upper panel of figure 2 represents a top view onto the B face. This concave side of the  $\beta$ -sandwich features two protruding loops formed by residues 78-89 and 160-179 (Fig. 3), with the latter one being mostly unresolved in the electron density map. The A face is covered by another loop of residues 189-205 with a short  $\alpha$ -helical stretch. This loop coordinates a metal ion via the side-chain carboxy group of the residue D202. This metal ion was modeled as Mg<sup>2+</sup> based on an average coordination distance of 2.0 Å and the presence of 0.2 M MgCl<sub>2</sub> in the crystallization medium (Fig. 2, suppl. Fig. S2A). The residual octahedral coordination sphere of the metal ion is completed by five water molecules, which in turn are not directly bound by other parts of the protein.

Two disulfide bridges stabilize the protein fold (suppl. Fig. S2B). C58-C123 links strands  $\beta$ 3 and  $\beta$ 8 in the  $\beta$ -sheet of the A face (Fig. 3). C200-C228 connects the long A face loop 189-205 with the C-terminal residues of the PTX-like domain. This domain contains one putative N-glycosylation site at N166. The presence of N-glycosylation was verified by SDS-PAGE-based glycan staining (suppl. Fig. S1). Due to the disorder of residues 163-175, glycosylation at this site is not resolved in the crystal structure.

A multiple amino acid sequence alignment of 59 mammalian ADGRG4 orthologs was employed to determine the Shannon entropy as (Zheng et al. 2008) a measure of evolutionary conservation for each residue of the PTX domain (see supplements for species included). The result mapped onto the ADGRG4-PTX structure is shown in figure 4. Overall, there is a high degree of amino acid sequence conservation among the species, even for most surface residues. Especially the core strand residues of the  $\beta$ -sandwich exhibit the lowest Shannon entropy and thus highest conservation. The highest evolutionary variability is found for the loop 64-70 connecting strands  $\beta$ 3 and 4 and the unresolved loop 160-179. Longer stretches

of extraordinary high conservation comprise the N-terminus including  $\beta 1$ ,  $\beta 4$ ,  $\beta 8$ , and  $\beta 9$  including their connecting loop,  $\beta 11$  and  $\beta 12$ . Interestingly, these conserved sections represent pairs of antiparallel  $\beta$ -strands:  $\beta 1$ - $\beta 12$ ,  $\beta 8$ - $\beta 9$  (A face), and  $\beta 4$ - $\beta 11$  (B face).

### **The PTX-like fold exhibits distinct differences to structural homologs**

To identify structural similarities the refined structural model of ADGRG4-PTX was submitted to the PDBeFold server for pairwise structural alignment with existing PDB structures (Krissinel and Henrick 2004). Based on the r.m.s.d. of the  $C_{\alpha}$ -chains, a selection of different structural relatives is given by Tab. S1. The closest structural relation is found for the human neuronal pentraxin 1 (NP1, 25 % identity) (Suzuki et al. 2020). The structures of the human CRP and human SAP follow very closely in this structural comparison. Figure 5 shows a multiple sequence alignment of the four proteins. The majority of the longer A face  $\beta$ -strands shows high conservation, with the B face being less conserved among the regarded pentraxins. Loops and outer  $\beta$ -strands are generally less conserved. Interestingly, the disulfide bridge C58-C123 (ADGRG4-PTX) that links two core  $\beta$ -strands of the A face is conserved among all structural relatives. However, the second disulfide bridge C200-C228 is not analogously found in CRP and SAP, but it is present in the NP1 structure. Furthermore, the amino acid sequence alignment indicates an ADGRG4-PTX section which does not align to the other sequences (marked yellow in Fig. 5). It forms the extended B face loop 53-66, which is not present in the related structures. The second B face loop 160-179 (marked blue in Fig. 5) is partially shared by all four pentraxins. However, the loop sequence of ADGRG4-PTX is mostly unrelated to its structural homologs and it is partially disordered, so the dashed line does not represent its actual length. In contrast, the other pentraxins share a high sequence identity and structural similarity in this area.

### **The N-terminus of ADGRG4 shows $Ca^{2+}$ -independent homodimerization**

Initial dynamic light scattering (DLS) of ADGRG4-PTX indicated oligomerization based on a hydrodynamic radius that was too large for an expected monomer mass of 30.5 kDa. To obtain more precise information about the molar mass in solution, static light scattering (SLS) was performed (suppl. Fig. S3). Indeed, the molecular mass determined by SLS increased with protein concentration and indicated a monomer-dimer-equilibrium in solution. The unit cell of the ADGRG4-PTX crystals contained a single protein chain as asymmetric unit. To address a potential homodimer interface, the respective symmetry mates in the C2 space group were assessed. Four different types of protein-protein contacts are present within the crystal lattice (suppl. Fig. S4). However, there is only one interface generated by point symmetry that exhibits a sufficient surface area for homodimerization. Figure 6 gives an overview of the interactions that constitute this dimer interface. The two protomers interact such that the two strands at the edge of the sandwiched  $\beta$ -sheet interact with those of the other protomer ( $\beta 7$  with  $\beta 10'$  and  $\beta 10$  with  $\beta 7'$ , Fig. 3, Fig. 6). By this interaction two large continuous  $\beta$ -sheets are formed across the dimer interface. Core interactions are mediated by peptide backbone hydrogen bonds between each pair of opposing antiparallel strands (Fig. 6). In addition, the apolar side chains between the sandwiched  $\beta$ -strands 7 and 10 interact at the dimer interface via hydrophobic interactions and with tight steric fit. The peptide backbone hydrogen bonds are supported by several side-chain hydrogen bonds. Here, the tightest interaction is formed between the carboxamide- $O_{\epsilon}$  of Q98 from  $\beta$ -strand 6 (Fig. 6) and the guanidinium moiety of R141' of  $\beta 10$ . Additional hydrogen bonds are established between residues T107-T146, T107-E144' (via a water molecule) and S109-E144' (via a water molecule, Fig. 6). An ionic interaction is possible between R111 and E140' at the interface flanks, however, for both residues the density indicates significant side-chain flexibility.



To further characterize the monomer-dimer-equilibrium, SAXS experiments were performed at different ADGRG4-PTX concentrations. The scattering profiles exhibited concentration-dependent changes, which are highlighted by the observed  $R_g$  (radius of gyration) and  $D_{max}$  (maximum diameter of particle) values at different ADGRG4-PTX concentrations (suppl. Tab. S3). We determined the volume fractions of monomer and dimer for the scattering curves obtained at different protein concentrations via modeling with the program OLIGOMER (Fig. 7) (Konarev et al. 2003). Figure 8c shows a plot of the dimer volume fraction against  $c(\text{ADGRG4-PTX})$ . The data fit to the following binding model (with  $X_{Dimer}$  being the molar fraction of homodimer in the equilibrium):

$$X_{Dimer} = X_{Dimer}^{max} \cdot \frac{[\text{ADGRG4-PTX}]}{K_D + [\text{ADGRG4-PTX}]},$$

with a dissociation constant of  $K_D = (16 \pm 1) \mu\text{M}$  (Bisswanger 2017). This micromolar affinity characterizes the ADGRG4-PTX homodimer as a transient protein-protein interaction (Perkins et al. 2010). The discrepancy  $\chi^2$  between fit and data increases at higher protein concentrations, which is due to larger deviations in the low  $q$ -region ( $q \leq 0.15 \text{ \AA}^{-1}$ ). This finding is probably due to additional intermolecular interactions at higher protein concentrations. The calculated scattering curves of the symmetrical dimer models 1 and 2 (Figure S4) were too similar to experimentally distinguish the two dimer models in the presence of the observed monomer-dimer mixture.

The classical pentraxins, CRP and SAP, feature characteristic  $\text{Ca}^{2+}$ -binding sites, which are indispensable for ligand binding and, in case of CRP, pentamer stabilization (Fig. 8) (Pepys 2018). However, in the elucidated structure, only one bound metal ion was detected (see Fig. 2 and suppl. Fig. S2A), which is only loosely coordinated by a single carboxylate side chain. A potential influence of physiological  $\text{Ca}^{2+}$  concentration on the protein's quaternary structure was assessed by DLS, SLS, nanoDSF, and crystallography. No significant change in the hydrodynamic radii and molecular mass was

observed in the presence of  $\text{Ca}^{2+}$  (suppl. Fig. S5a). However,  $\text{CaCl}_2$  addition does increase the melting temperature  $T_m$  by 1.6 K, indicating a stabilizing effect on the ADGRG4-PTX fold (suppl. Fig. S5b). To study potential structural consequences of  $\text{Ca}^{2+}$  presence, crystals were soaked with 100  $\mu\text{M}$ , 1 and 10 mM  $\text{CaCl}_2$  for 1 h or 19 h. Furthermore, the protein was also crystallized in presence of 10 mM  $\text{CaCl}_2$ . At least one dataset per condition was recorded and analyzed. However, none of these datasets revealed new features in the electron density compared to the previous results without  $\text{Ca}^{2+}$  addition (data not shown). Support for a  $\text{Ca}^{2+}$ -independent dimerization comes also from the comparison of the pentamer interfaces and the  $\text{Ca}^{2+}$ -binding sites of CRP with the ADGRG4-PTX structure (Fig. 8). The pentamer-forming interaction sites in CRP and the corresponding positions in ADGRG4-PTX show low conservation (suppl. Fig. S6). This makes an ADGRG4-PTX oligomer formation similar to CRP unlikely. Furthermore, the  $\text{Ca}^{2+}$ -coordinating carboxyl groups in CRP are not conserved in ADGRG4-PTX (Fig. 8). These facts together with the distant phylogenetic relation between CRP and ADGRG4-PTX (Fig. 1B) suggest that the PTX domain does not form  $\text{Ca}^{2+}$ -dependent pentameric homophilic interactions.

As described before, the ADGRG4-PTX dimer interface is mainly formed by interactions between strands  $\beta 7$  and  $\beta 10$  at the edge of the central  $\beta$ -sheets. Since the hydrophobic side chains between these sandwiched  $\beta$ -strands are relatively well-conserved for their structural function in the densely packed core of the fold, it is difficult to deduce an additional functional role in dimer formation by conservation analysis (as opposed to generally less-conserved solvent exposed surface residues). We therefore analyzed the prediction of dimer structures by the AlphaFold machine learning algorithms (Jumper et al. 2021). AlphaFold uses two main sources of structural information for its prediction: Experimentally determined template structures of related proteins and coevolution of residues in spatial proximity in

the folded protein. The first ranked dimer model matches the experimental ADGRG4-PTX dimer structure well (suppl. Fig. S7). Also, the model confidence of the dimer structure is high as demonstrated by the low predicted aligned errors between the protomers (PAE parameter in suppl. Fig. S7). As the template structures involved in modelling the dimer structure did not include structures that resemble the ADGRG4-PTX dimer, the model is predominantly based on information from sequence coevolution. Next, we also predicted the dimer structure for an additional 12 out of the 59 mammalian ADGRG4 homologs of the multiple sequence alignment (Fig. 4, suppl. Fig. S8). The sequences were chosen to evenly cover the phylogenetic tree. This analysis indicates that formation of this dimer is a conserved feature for all mammals and that it has functional relevance for the receptor (see Figure legend of suppl. Fig. S8 for further details).

#### **The putative dimer interface resembles that of SHBG and lectins**

A very similar dimerization mode as found for ADGRG4-PTX has been described for the SHBG N-terminal LG domain (Grishkovskaya et al. 2002; Round et al. 2020). Here, the N-terminal LG domain provides both the steroid-binding site and the homodimer interface. However, this dimerization is  $\text{Ca}^{2+}$ -dependent and facilitated by ligand binding (Bocchinfuso and Hammond 1994).

Recently, Leon et al. elucidated the structure of the zebrafish ADGRG6-ECR, which contains an internal PTX-like domain (Leon et al. 2020). However, the authors did not comment on the oligomeric state of the ECR in solution and the crystal structure does not feature a comparable dimer interface (PDB 6V55). As the ADGRG6-PTX domain represents the closest relative to ADGRG4-PTX, we also investigated ADGRG6 oligomerization. Therefore, the ECR of ADGRG6 was expressed in HEK293 cells, purified and analyzed by SEC-MALS-SAXS coupling (to be published). Conversely, the obtained molecular mass matches perfectly the expected one of a monomeric ECR. Furthermore, there is only poor sequence

homology between ADGRG4-PTX and ADGRG6-PTX within the two strands  $\beta 7$  and  $\beta 10$  that form the putative homodimer interface (compare Figs. 3 and 9). AlphaFold predictions for the PTX-like domains of ADGRD1, ADGRD2 and ADGRG6 do not indicate dimer formation (suppl. Fig. S9). Hence, we conclude that our observations for ADGRG4-PTX are not generalizable for other PTX-like domains found in aGPCRs.

#### **The typical binding rim of LG domains shows high surface conservation in ADGRG4-PTX**

Despite their phylogenetic proximity, ADGRG4-PTX differs significantly from classical PTXs. This finding is supported by the non-PTX-like features of this “PTX-like” domain: There is no apparent  $\text{Ca}^{2+}$ -dependent pentamerization. In contrast to classical PTXs, the functionally important B face does not exhibit the typical  $\text{Ca}^{2+}$ -binding site (Fig. 8). Instead, the respective loop 160–179 is highly disordered and of comparably low evolutionary conservation with almost no sequence similarities to CRP or SAP (Fig. 5). In contrast to their high structural similarity, the main ligand-binding interface of PTX and LG domains differs significantly. While PTXs bind their ligands via the B face of the  $\beta$ -sandwich and its characteristic  $\text{Ca}^{2+}$ -binding sites, LG domains employ the  $\beta$ -sandwich rim opposite to the N- and C-terminus as interaction area. This binding site is mainly established by the loops connecting strands  $\beta 2$ – $\beta 3$  and  $\beta 10$ – $\beta 11$ . Diversity in these loops enables a broad ligand spectrum, with the core  $\beta$ -sandwich providing a rather rigid scaffold (Rudenko et al. 2001). In adhesive interactions between LG domains and proteoglycans, a divalent cation is typically involved which is only weakly coordinated by one or two residues of the LG domain. For example, the LG4 and 5 domains of the  $\alpha$ -subunit of laminin-2 bind a glycan chain of  $\alpha$ -dystroglycan mediated by bound  $\text{Ca}^{2+}$ . A similar mechanism is proposed for the heparin proteoglycans agrin and perlecan (Dempsey et al. 2019). For the binding of steroid hormones

to SHBG, the same  $\beta$ -sandwich rim area is essential again. In contrast to ADGRG4-PTX and other LG domains, in SHBG the loop linking strands  $\beta$ 10 and  $\beta$ 11 shows high disorder, which is probably critical for steroids to intercalate the  $\beta$ -sheets (Grishkovskaya et al. 2000). Intriguingly, an alignment of all PTX-like domains present in aGPCRs reveals a conserved patch of surface residues, located within the  $\beta$ 2-3 loop around a “PEL” consensus sequence (Fig. 9). The central, highly conserved glutamate residue (E51 for ADGRG4) protrudes from the surface (suppl. Fig. S10). This finding suggests a common interaction interface for ADGR-PTX-like domains, which resembles that of the LG domain binding rim.

### **Possible implication of the ADGRG4-PTX domain structure on *in vivo* functions**

In principle ADGRG4-PTX homodimerization can occur at the same cell (*cis*) or between different cells in close proximity (*trans*) expressing the receptor protein. Homophilic interactions in *trans* were previously shown for other aGPCRs. For example, ADGRC1 (CELSR1) undergoes homophilic *trans* interactions and concentrates at cell-cell contacts in adherens junctions, where it is involved in the planar-cell-polarity (PCP) pathway required for neural plate bending (Nishimura et al. 2012). *Trans* dimerization was found also for the homologs ADGRC2 and 3 (Shima et al. 2007). Similarly, Flamingo, a structurally related aGPCR in the fly *D. melanogaster*, is localized at cell-cell boundaries of Drosophila wing cells and engages in PCP signaling (Usui et al. 1999). In both cases, *trans* homodimer formation is mediated by repeats of cadherin domains within the ECR. ADGRG1 (GPR56) represents another example of a homophilic *trans* interaction of the ADGRG subfamily. Here, Paavola et al. showed that the homophilic N-terminal interaction enhances ADGRG1-mediated RhoA activation (Paavola et al. 2011).

Given the size of over 2,700 amino acid residues of the ADGRG4 ECR, which is even larger than the ECRs of ADGRC, it is

reasonable to assume homophilic *trans* interaction mediated by the N-terminal PTX-like domain. The highly glycosylated mucin-like stalk (Fredriksson et al. 2002) between the PTX-like and HRM domain might act as a spacer to span intercellular clefts, enabling the ADGRG4-PTX to reach remote binding partners. An unfolded protein has a contour length of approximately 4 Å per residue (Ainavarapu et al. 2007), but the chain is highly flexible and forms mostly globular random coil structures. It has been shown for mucins, that the O-glycosylation increases the stiffness (persistence length) of the peptide core about 10-fold resulting in the formation of an extended structure, such that the radius of gyration increases almost 10-fold (Gerken et al. 1989). With a pitch of 2.5 Å, as determined for mucins, a fully extended ECR-chain of ADGRG4 may span a distance of more than 0.5  $\mu$ m. Recently, Malaker *et al.* developed an algorithm to detect mucin-like domains within the human proteome (Malaker et al. 2022). The algorithm first identifies O-glycosylation sites via the NetOGlyc 4.0 server (Steenfot et al. 2013). Overlapping phosphorylation sites are subtracted from the total O-glycosylation sites as false positives. Next, based on four mucin-typical benchmarks, the algorithm determines a so-called “mucin score”. A mucin score of >2 represents a high confidence for the mucin domain assignment. Values between 1.5–1.2 represent a low confidence, while lower scores are not considered mucin-like. Analysis of ADGRG4 results in a mucin score of 3.4, which clearly indicates the mucin-like properties of the receptor. The algorithm detected a total of 212 mucin-domains, which arrange seamlessly starting at residue 279 until residue 2244 (Uniprot Q8IZF6). This region starts C-terminally to the PTX-like domain and ends roughly 140 amino acids N-terminal to the predicted HRM. Interestingly, ColabFold (Mirdita et al. 2021) predicted this ~140 amino acid stretch to establish a Sperm protein, Enterokinase and Agrin (SEA) domain (suppl. Fig. S11). SEA domains are a typical feature of many mucins: MUC1, MUC3, MUC12, MUC13 and MUC17 mucins all possess a



single, and MUC16 even multiple SEA domains (Pelaseyed et al. 2013). However, the typical autoproteolytic site G↓S[V/I]VV present in many mucin SEA domains is lacking for the ADGRG4 SEA domain. The presence of SEA domains has been reported already for three other aGPCR ECRs, namely ADGRF1 (GPR110), ADGRF5 (GPR116) (Fredriksson et al. 2002; Lum et al. 2010) and ADGRG6 (GPR126) (Leon et al. 2020). The homodimerization of ADGRG4's N-terminal domain presented in this study strongly suggests a homophilic *cis* but also a *trans* dimerization (<1 μM distance) of this receptor. We determined a  $K_D$  value of 16 μM for the dimerization *in vitro* (Fig 7C). This translates into a binding  $\Delta G$  of 28.5 kJmol<sup>-1</sup> at 37 °C. Interestingly, the dimer interface does not mask the typical LG domain binding rim. Therefore, it is likely that additional ligands may bind to the ADGRG4-PTX homodimer.

ADGRG4 has been discovered as a specific marker of enterochromaffin (EC) cells (Leja et al. 2009) and Paneth cells (Franzén et al. 2019). EC cells are responsible for serotonin production and secretion and are most abundant in the mucosa of the duodenum (Ito et al. 2009). The mucosa of the small intestine forms a surface of villi and crypts, which contributes to a large overall surface area gain. The crypts represent deep but very narrow clefts. Here, EC cells are mainly localized (GRAEME-COOK 2009). EC cells feature a luminal side which forms microvilli, as well as a basolateral border that is in contact with afferent and efferent nerve terminals located at the lamina propria (Bistoletti et al. 2020). Similarly, Paneth cells are specialized secretory epithelial cells mainly localized in the crypts of the small intestine. Given the large ECR of ADGRG4 which is potentially able to span a distance of close to 0.5 μm, homophilic *trans* interactions between cells at opposite sides of the crypt lumen may represent a plausible scenario. Together with the general notion of aGPCRs to act as mechanosensors (Petersen et al. 2015; Wilde et al. 2016; Scholz et al. 2017; Yeung et al. 2020) we hypothesize that ADGRG4 acts as a distance

sensor within epithelial crypts of the small intestine via *trans* homodimerization (Fig. 11). Movements of the intestinal tract may lead to transient dilations of the crypts. Alternatively, epithelial layer growth may separate *trans*-interacting cells. Once a maximal distance of ~1 μm is reached (considering two ADGRG4 *trans* dimer molecules), traction forces are generated due to the homodimer interaction. These forces could be transmitted via the stalk region to the GAIN domain, resulting in an exposure of the agonistic *Stachel* sequence or activity-relevant isomerization of the tethered agonistic sequence (Fig. 10) (Liebscher and Schöneberg 2016; Schöneberg et al. 2016). To investigate whether such *trans* interaction is feasible we localized ADGRG4 in small intestine with different methods. First, we applied an anti ADGRG4 antibody directed against the ECD of the receptor. As shown in Figure 11A, immunopositive cells were mainly scattered in the intestinal epithelium of crypts and villi. Next, a specific probe to detect ADGRG4 mRNA was used and epithelium cells were co-stained with an anti-β-catenin antibody (Fig. 11B). Again, ADGRG4-expressing cells were mainly scattered in the intestinal epithelium. However, we did not find opposed ADGRG4-expressing cells rejecting the hypothesis of a *trans* homodimerization as the major form of interaction. Therefore, the *cis* homodimerization is more likely. Together with the fact that the highly glycosylated mucin-like stalk between the PTX-like and HRM domain has an increased stiffness and is most likely orientated to the intestine lumen, we propose that ADGRG4 acts as a mechanosensor for shear forces.

In sum, our findings show a specific PTX structure enabling ADGRG4 to homodimerize via this domain. Reflecting the unique structure of ADGRG4, the activation mechanism by exposing a tethered sequence in its active conformation (*Stachel*) to the 7TM and its highly cell-specific expression one can assume that this aGPCR is a shear stress mechanosensor in EC and Paneth cells of the small intestine.

## Experimental Procedures

### Materials

All chemicals, reagents and compounds used in this study were purchased from AppliChem (Darmstadt, Germany), Carl Roth (Karlsruhe, Germany), Sigma-Aldrich (Steinheim, Germany), SERVA (Heidelberg, Germany), and Roche (Basel, Switzerland). Cell culture media and supplement were obtained from Gibco®, Life Technologies™, Thermo Fisher Scientific (Waltham, MA, USA). Enzymatic reagents and buffers were purchased from New England Biolabs (Frankfurt a. M., Germany), Thermo Fischer Scientific and Fermentas (St. Leon-Rot, Germany). Molecular biology kits were ordered from Qiagen (Hilden, Germany). Prepacked columns for protein purification were purchased from GE Healthcare (Buckinghamshire, UK). Primers were obtained from biomers.net GmbH (Ulm, Germany). To verify cloning results, Sanger sequencing was performed by Eurofins Genomics Germany GmbH (Ebersberg, Germany).

### Methods

#### Preparation of ADGRG4-PTX-like domain

##### *Molecular cloning*

The cDNA encoding for the N-terminus of the human ADGRG4 was synthesized by the Thermo Fisher GeneArt service. For subcloning into the pVito2-EGFP backbone, the following primers were ordered: forward: 5'-TATAACGCGTGCCACCATGAAGGAACA CATCAT-3' (*Mlu*I), reverse: 5'-GTACGTCGACTCATTATTTCTCGAACTG GGGGTG-3' (*Sal*I). The final expression vector comprised the ADGRG4 amino acid sequence 1-240 (referred to as ADGRG4-PTX) with a GS-linker, enteropeptidase site and StrepII-tag at the C-terminus (suppl. Fig. S1). The vector backbone also contained a cassette for

constitutive EGFP coexpression and a hygromycin resistance as selection marker for stable recombinant mammalian expression.

##### *Generation of a stable cell line for large scale ADGRG4-PTX expression*

A stable HEK293S GnTI<sup>-</sup> cell line expressing the ADGRG4-PTX construct described above was established using hygromycin B resistance. The cell line was cultured in full medium, consisting of DMEM supplemented with 10% (v/v) fetal bovine serum, 1% (v/v) GlutaMax, 1% (v/v) non-essential amino acids and 1% (v/v) penicillin/streptomycin. For large scale expression, aliquots of the cryo-stored cell line were seeded of a single T-75 tissue culture flask and further expanded in T-175 (25x10<sup>6</sup> cells). After reaching confluency, the cell were transferred into roller bottles (2125 cm<sup>2</sup> surface area). The cell line was kept in roller bottles for two weeks, with two medium exchanges using reduced medium, which contained only 2% (v/v) of fetal bovine serum. The conditioned media of all passaging steps were stored at 4 °C and pooled. 1 mL of BioLock biotin blocking solution (IBA Lifesciences) were added to 1.5 L conditioned medium. The medium was gently stirred for 45-60 min at 4 °C and subsequently submitted to centrifugation at 16,000x g for 30 min. After that, the supernatant was filtered through a 0.22 µm polyether sulfone membrane (Techno Plastic Products). Prior to affinity chromatography, the filtered conditioned medium was tenfold concentrated by an ultrafiltration unit (10 kDa molecular weight cut-off (MWCO), GE Healthcare).

##### *Purification*

All chromatography steps were performed at 4 °C using the ÄKTExpress and ÄKTA pure protein purification systems (GE Healthcare). For affinity purification of the ADGRG4 construct, three 5 mL StrepTrap HP (GE Healthcare) were connected to increase the amount of isolated protein per flow through. The washing buffer contained 100 mM Tris pH 8.0, 150 mM NaCl. The elution buffer additionally contained 2.5 mM D-desthiobiotin. After affinity chromatography, the preparation

was further polished via size-exclusion chromatography (SEC). Here, a HiLoad® 16/60 Superdex® pg 200 (GE Healthcare) was applied for preparative runs. The eluate of the affinity purification was concentrated to a volume between 1-2 mL before injection using centrifugal filter units (Amicon, Merck millipore) with a MWCO of 5,000 Da. The SEC buffer contained 20 mM Tris pH 8.0, 150 mM NaCl.

### *Gel-based analyses*

SDS-PAGE analysis was conducted after Laemmli. To stain protein glycosylations on SDS-PAGE gels, the periodic acid-Schiff-base method was employed (McGuckin and McKenzie 1958; Zacharius et al. 1969). Western blot analysis was performed via semidry electroblot onto a PVDF-membrane. After blocking the membrane with 3% (w/v) albumin in PBS-T over night, it was treated for 1.5 h with a StrepTactin horse radish peroxidase conjugate (IBA Lifesciences), diluted 1:75,000 in PBS-T. The membrane was washed twice in PBS-T and three times in PBS and readout was enabled using the ECL Select Western Blotting Detection Reagent (GE Healthcare).

### **Dynamic and static light scattering**

Light scattering measurements were performed using a DynaPro® NanoStar® device (Wyatt Technologies). The sample was centrifuged prior to measurements for 10 min at 21,000x g. 3 µL of sample were pipetted into a quartz cuvette. After inserting the cuvette into the device, the system was allowed to equilibrate at 20 °C for 4 min. The integration time for autocorrelation was set to 5 s. Using the software DYNAMICS® (Wyatt Technologies), the autocorrelation function was analyzed by fitting it both in a cumulant and regularized manner. For SLS, a matching buffer blank was measured additionally.

### **X-ray crystallography**

#### *Crystallization*

Crystals suitable for X-ray crystallography were obtained by hanging drop vapor diffusion by mixing 3 µL of protein solution at 3.1 mg/mL with 1 µL of reservoir solution containing 0.1 M Tris pH 8.5, 30 % polyethylene glycol (PEG) 4000 and 0.2 M MgCl<sub>2</sub>. Crystals between 100-200 µm length grew within a week.

#### *Data collection and structure determination*

Prior to X-ray diffraction experiments, suitable single crystals (min. 50-100 µm length) were transferred for a few seconds to a solution containing the respective crystallization reservoir composition and additional 20% (v/v) glycerol as cryoprotectant. Then, the crystals were snap-frozen in liquid nitrogen on nylon loops connected to goniometer-compatible magnetic mounts and stored in liquid nitrogen-immersed vials until measurement. Crystallographic measurements were performed using synchrotron radiation at beamline P14, operated by EMBL Hamburg at the PETRA III storage ring (DESY, Hamburg, Germany). Data were collected at  $\lambda=2.0664$  Å (for phasing via anomalous dispersion, data not shown) or 0.9762 Å (Tab. S2) by an EIGER 16M detector. During data collection, the crystal was constantly cooled to 100 K via a nitrogen jet. Data reduction was performed by XDS (Sparta et al. 2016). Phasing was achieved by combining molecular replacement (MR) and sulfur single-wavelength anomalous diffraction (S-SAD) using PHASER and PHASER-EP (McCoy et al. 2007). The initial models were iteratively improved by refinement using phenix.refine (Liebschner et al. 2019) and manual rebuilding in COOT (Emsley et al. 2010) (suppl. Tab. S2). Molecular figures were generated with Pymol ([www.pymol.org](http://www.pymol.org)).

#### **Small-angle X-ray scattering**

SAXS measurements were performed using synchrotron radiation at beamline P12, operated by EMBL Hamburg at the PETRA III storage ring (DESY, Hamburg, Germany) (Blanchet et al. 2015). Data were collected at 1.23987 Å

using a Pilatus 6M detector at 3.0 m sample-detector distance. The sample cell consisted of a horizontal thermostated (278-323 K) quartz capillary with 50  $\mu\text{m}$  thick walls and a path length of 1.7 mm. The samples (30  $\mu\text{L}$ ) continuously flowed through the quartz capillary to reduce X-ray radiation damage. To minimize aggregation due to radiation damage, 3–5 % (v/v) glycerol was added to the samples.

The SAXS data were automatically processed on-site by the SASFLOW suite (Franke et al. 2012). Processing involves radial averaging of the two-dimensional scattering pattern, normalization against the transmitted beam intensity, detection and exclusion of frames suffering from radiation damage and buffer background subtraction.

## Phylogenetic analysis

### *Cluster analysis*

The sequences of PTX-like domains were taken from NCBI and aligned using MUSCLE implemented in MEGA11 (Stecher et al. 2020; Tamura et al. 2021). The evolutionary history was inferred by using the Maximum Likelihood method and JTT matrix-based model (Jones et al. 1992). The bootstrap consensus tree inferred from 1000 replicates (Felsenstein 1985) is taken to represent the evolutionary history of the taxa analyzed. Branches corresponding to partitions reproduced in less than 50% bootstrap replicates are collapsed. The percentage of replicate trees in which the associated taxa clustered together in the bootstrap test 1000 replicates) are shown next to the branches (ibid.). Initial tree(s) for the heuristic search were obtained automatically by applying Neighbor-Join and BioNJ algorithms to a matrix of pairwise distances estimated using the JTT model, and then selecting the topology with superior log likelihood value. This analysis involved 102 amino acid sequences. There were a total of 350 positions in the final dataset. Phylogenetic analyses were conducted in MEGA11 (Stecher et al. 2020; Tamura et al. 2021).

### *Shannon-entropy conservation scores*

A multiple sequence alignment (MSA) of 59 mammalian ADGRG4 orthologs was generated using MUSCLE. Based on this MSA, the Shannon entropy of each aa residue was determined as a measure of evolutionary conservation (Shannon 1948). Subsequently, these Shannon entropy scores were plotted onto the crystal structure, employing the Protein Variability Server (Garcia-Boronat et al. 2008).

## Structure prediction

The ColabFold (Mirdita et al. 2021) implementation of AlphaFold algorithms (Jumper et al. 2021) was used to predict dimer structures. Calculations were run on the ColabFold notebook AlphaFold2.ipynb. Multiple sequence alignments were generated via MMseqs2 (Mirdita et al. 2021) using sequences from UniRef. AlphaFold2-multimer was used for structure prediction and the "paired+unpaired" mode (ibid.) was chosen for complex prediction.

## Cell localization experiments of ADGRG4 (GPR112) in murine duodenum

### *Immunohistochemical (IHC) and immunofluorescence (IF) staining*

Small intestine was harvested from mice and fixed overnight at 4 °C in 4% phosphate-buffered formalin. After thorough rinsing with tap water, the tissue was dehydrated in a series of graded alcohols, passed through xylene, and embedded in paraffin wax. The embedded tissue was cut into 10  $\mu\text{m}$  thick sections, deparaffinized in xylene and rehydrated in a series of graded alcohols. Prior to IHC-anti-GPR112-staining, hydrated sections were heated in sodium citrate buffer (pH 6.0, 10 min) to retrieve antigens, immersed in 3%  $\text{H}_2\text{O}_2$  in phosphate buffered saline (PBS, pH7.4, 10 min, room temperature [RT]) to quench endogenous peroxidase activity, and incubated with 5% normal goat serum (30 min, RT) to reduce background staining due to nonspecific



interactions between the secondary biotinylated goat anti-rabbit antibody and the section surface. Primary anti-GPR112 polyclonal antibody (cpa3095, Cohesion Biosciences, London, UK) was diluted 1:100 in antibody buffer (PBS, pH 7.4 containing 0.5% bovine serum albumin (BSA) and 0.3% Triton X-100) and applied overnight at 4 °C in a humidified chamber. Immune complexes were visualized by successive incubations with biotin-conjugated goat anti-rabbit secondary antibody (1 h, RT), avidin-biotin-peroxidase complex (Vectastain, Burlingame, CA, 30 min, RT), and a mixture of 3,3'-diaminobenzidine and urea-hydrogen peroxide (SigmaFast DAB tablets, Sigma-Aldrich, St Louis, MO, 30-60 sec, RT). The peroxidase/DAB reaction was stopped by rinsing the sections with 0.05M Tris-HCl buffer, pH 7.4. Finally, immunohistochemically labeled sections were counterstained with Mayer's hemalum, dehydrated, and embedded with Roti-Histokit (Carl Roth, Karlsruhe, Germany). For immunofluorescence labeling, a 1:100 dilution of primary polyclonal anti-GPR112 antibody was applied together with primary monoclonal anti- $\beta$ -catenin antibody (1:100, #610154, BD Biosciences, Europe) on antigen-retrieved and background reduced sections overnight at 4 °C. Immune complexes were detected with a mixture of species-matched Alexa-568- and 647-conjugated secondary antibodies (1:400, Invitrogen, Carlsbad, CA, USA), whereas nuclei were counterstained with DAPI (4',6-diamidino-2-phenylindole, Serva, Heidelberg, Germany). Finally, sections were embedded in fluorescent embedding medium from Dako (Aligent, Frankfurt, Germany). Fluorescence images were captured using an LSM700 confocal laser scanning microscope (Carl Zeiss AG, Jena, Germany).

#### *Fluorescence in situ* hybridization (FISH)

The RNAscope Multiplex Fluorescent Reagent Kit v2 (Advanced Cell Diagnostics [ACD], Berlin, Germany) was used to localize ADGRG4 mRNA on small intestinal sections. Tissue was fixed with 4% phosphate buffered

formalin for 24 h and embedded in paraffin wax. Sections of 10  $\mu$ m were made from the paraffin embedded tissue samples and mounted on Superfrost® slides. ADGRG4 RNA labeling was performed using a commercially purchased probe from ACD according to the manufacturer's instructions. The 1:50 diluted probe was incubated on the tissue sections for 2 h at 40 °C in a manual HyBEZ™ II assay hybridization system (ACD). Probe remaining on the tissue sections was amplified and labeled with a single Opal 520 fluorophore at a dilution of 1:750 (OP-001001, Akoya Biosciences, Marlborough). After RNA labeling, combined  $\beta$ -catenin Alexa 647-IF staining and DAPI nuclear counterstaining was performed as described above. The now FISH-IF-stained sections were embedded and analyzed under the LSM 700 confocal laser scanning microscope (see above).

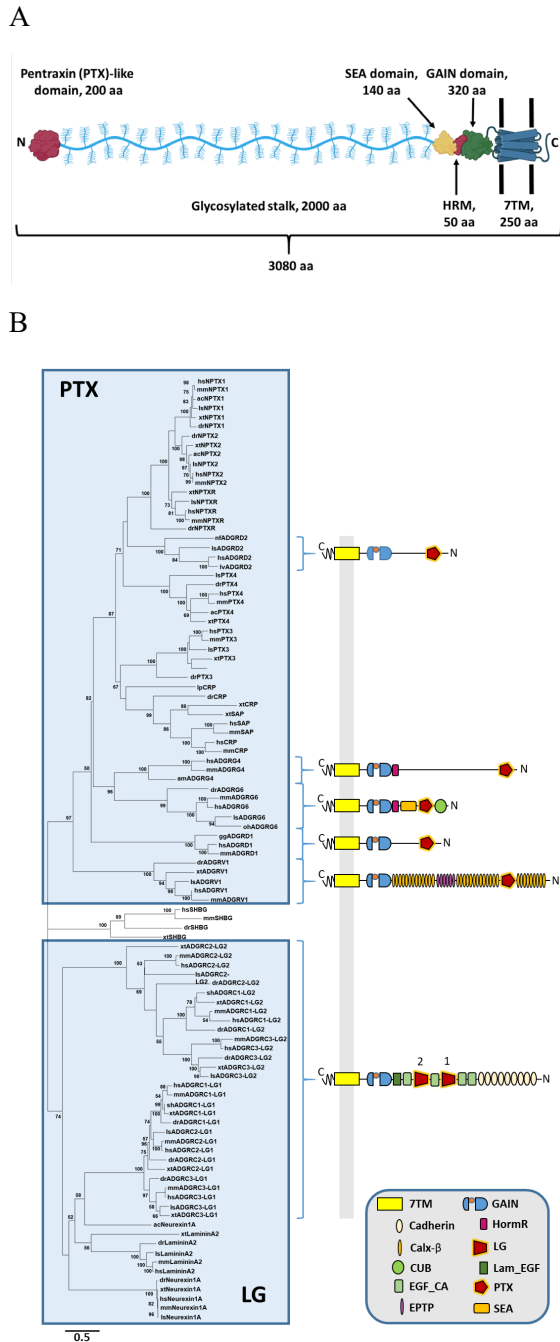

Fig. 1 Predicted molecular architecture of ADGRG4 and phylogenetic relation of PTX-like domains. The structural organization of the human ADGRG4 is shown, predicted domains are indicated with their rough amino acid lengths. Created with BioRender.com A). Phylogenetic tree of selected PTX-like domains was generated by the maximum likelihood method (see Methods). Species ac: *Anolis carolinensis* (green anole), am: *Alligator mississippiensis* (American alligator), dr: *Danio rerio* (zebrafish), gg: *Gorilla gorilla*, hs: *Homo sapiens*, lp: *Limulus polyphemus* (Atlantic horseshoe crab), ls: *Lonchura striata domestica* (Bengalese finch), lv: *Lipotes vexillifer*

(Chinese river dolphin), mm: *Mus musculus* (house mouse), nf: *Nothobranchius furzeri* (turquoise killifish), oh: *Ophiophagus hannah* (king cobra), sh: *Strigops habroptila* (kakapo), xt: *Xenopus tropicalis* (western clawed frog) B).

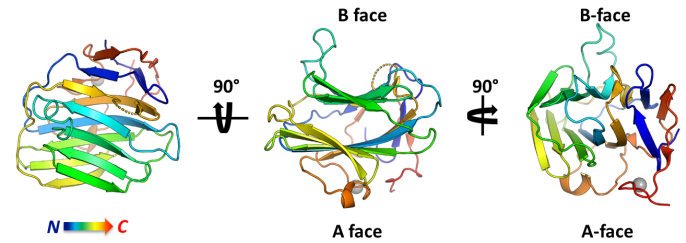

Fig. 2 Tertiary structure of ADGRG4-PTX in a rainbow-colored cartoon representation. The grey sphere represents a bound  $Mg^{2+}$  ion.

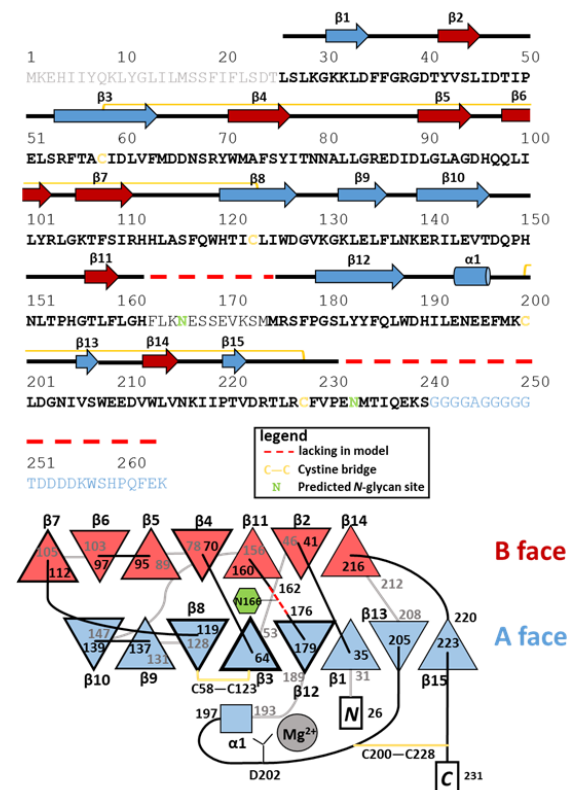

Fig. 3 ADGRG4-PTX secondary structure (top) and topology diagram (bottom). Bottom scheme: Black/gray lines depict loops in front/rear of the panel plane. The nomenclature of the  $\beta$ -sheets as A face and B face is made according to the structural relatives CRP and SAP. Frame thickness of the  $\beta$ -strands correlates with their respective aa length. Note that this scheme is not drawn to scale.

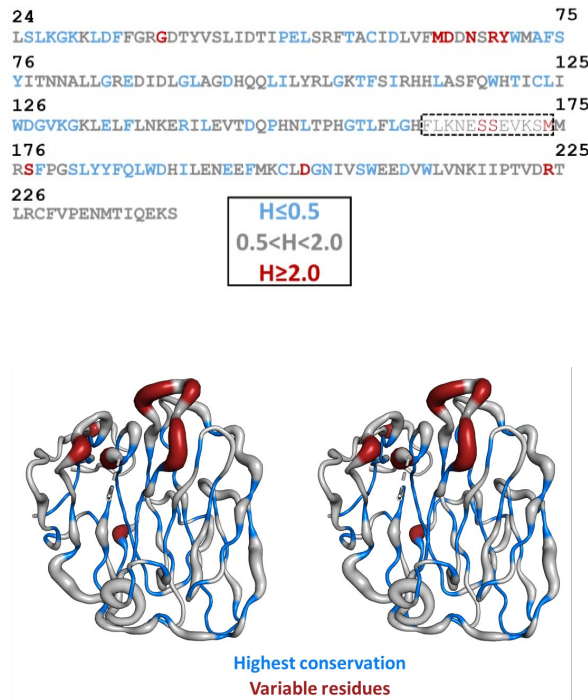

Fig. 4 Shannon entropy based on multiple sequence alignment of 59 mammalian species plotted onto the structural model. View onto the ADGRG4-PTX B face in wall-eyed stereo display. The model shows the  $C_{\alpha}$ -trace in differing thickness. The thickness represents the Shannon entropy,  $H$ , of a given position and thus its evolutionary variability. Residues of extraordinary low variability are highlighted in blue, variable residues are shown in red. In general, a residue exhibiting  $H < 2.0$  is considered conserved (Perelson 1992; Garcia-Boronat et al. 2008). The unresolved loop is labeled in the sequence by a dashed box.

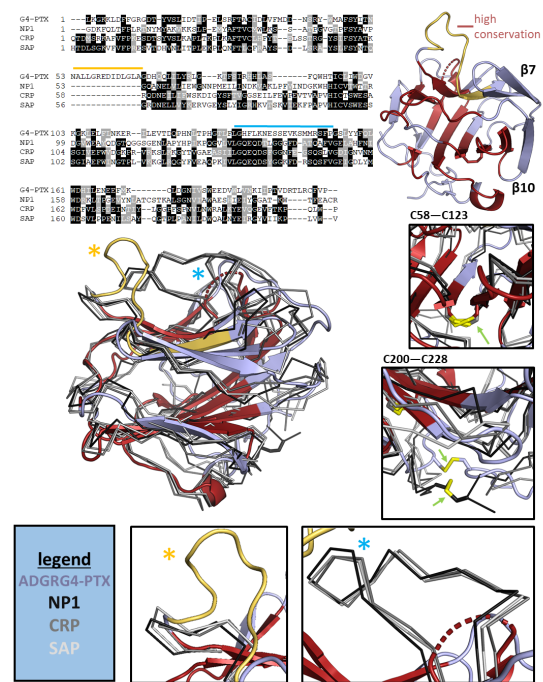

Fig. 5 Alignment with closest structural homologs. Shown is the aa range of ADGRG4-PTX 26-231, NP1 (6ypc) 225-429, CRP (1b09) 19-224 and SAP (2a3y) 20-223. Regions of the highest sequence consensus (based on the Toffee server (Notredame et al. 2000)) are highlighted in red in the ADGRG4-PTX structure. Boxes showcase distinct features of ADGRG4-PTX in comparison to its structural relatives. Note that disulfide bridge C58-C123 is present in all four structures, whereas disulfide bridge C200-C228 is only found in ADGRG4-PTX and NP1. The box with the yellow asterisk shows an extended loop which is solely present in ADGRG4-PTX. The box with the blue asterisk depicts a close-up view on the long loop of the B face, which exists in all structures, but is unresolved (flexible) in the ADGRG4-PTX structure.

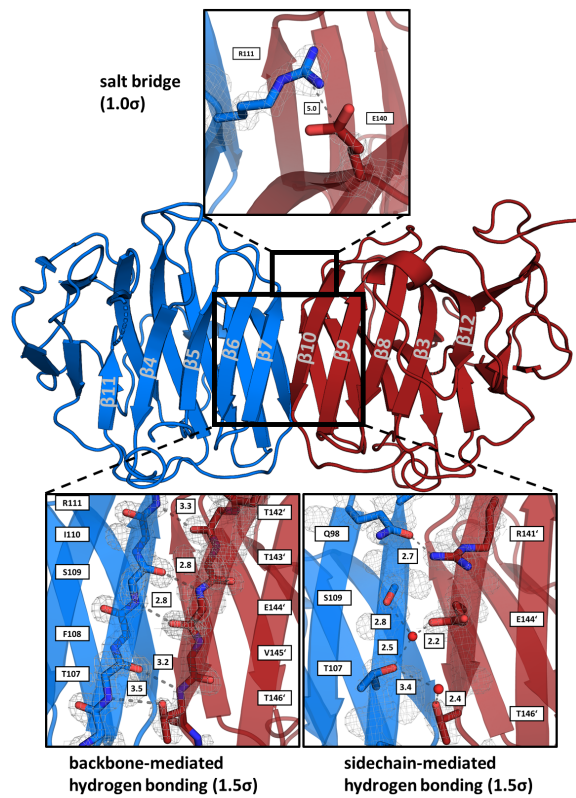

Fig. 6 Interactions at the homodimer interface. For a better overview, backbone-mediated hydrogen bonds are shown separated from side chain-only interactions. Distances are stated in  $\text{\AA}$  next to the dashed connectors. The respective contour levels of the  $(2F_o - F_c)$ -type electron density map are given next to the images.

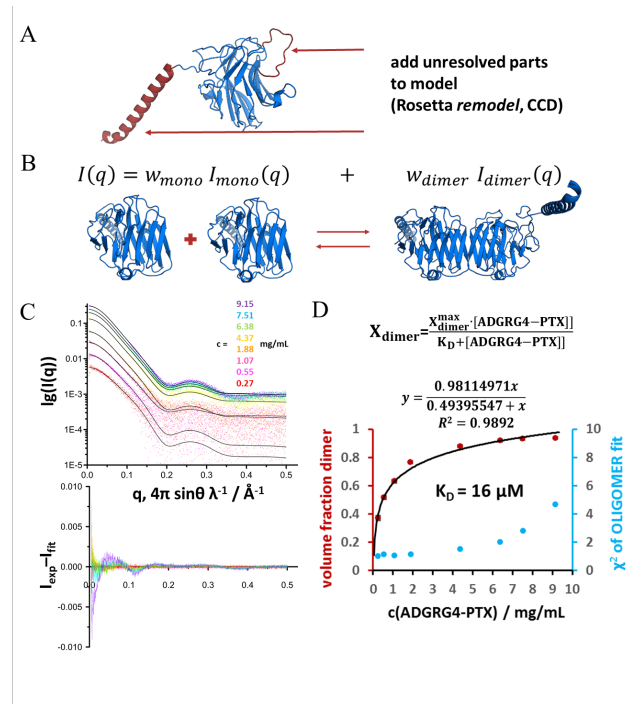

Fig. 7 Overview of OLIGOMER modeling and results. To obtain a reasonable model for fitting to the SAXS data, the crystal structure was modified by adding the unresolved loop and C-terminus using Rosetta remodel (Leaver-Fay et al. 2011) A). Scheme of the principle of OLIGOMER (Konarev et al. 2003) B). Summary of the results obtained from OLIGOMER. On the left the scattering profiles are shown in semi-logarithmic manner with the respective modeled fit curves (black) C). The volume fraction of the dimer as calculated by the OLIGOMER fit is plotted against the protein concentration. A hyperbolic fit of the volume fraction vs. protein concentration yields a  $K_D$  of  $16 \mu\text{M}$  for the homodimerization.  $X_{dimer}$ -volume fraction of dimer, derived from OLIGOMER D).



A

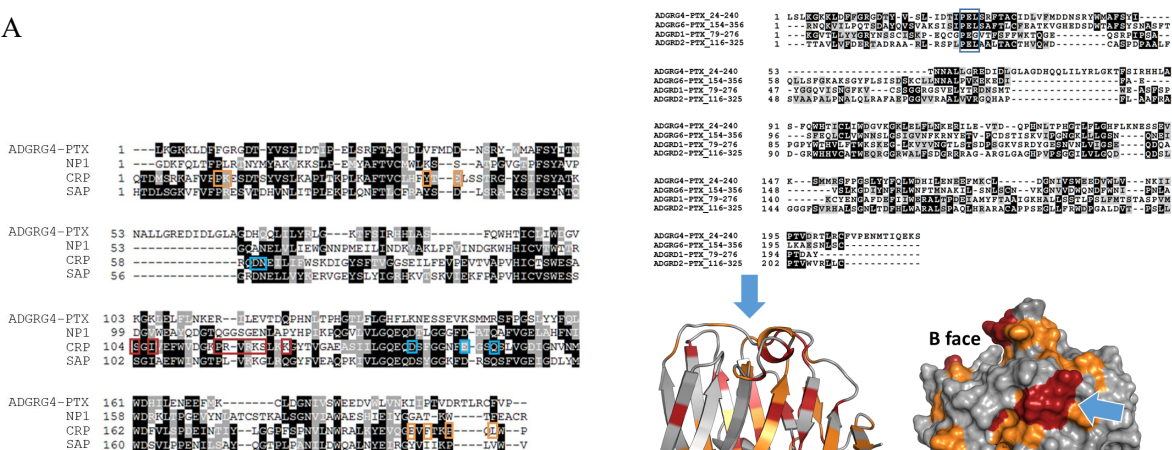

B

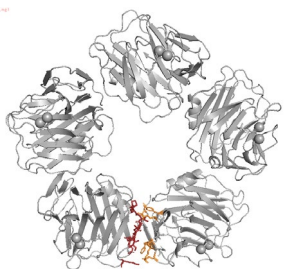

C

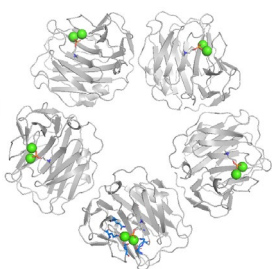

Fig. 8 Alignment of ADGRG4-PTX with structural homologs A), highlighting CRP pentamer interfaces B) and Ca<sup>2+</sup>-binding sites C). Note, there is no sequence similarity between ADGRG4-PTX and CRP in the highlighted regions.

Fig. 9 Alignment of ADGRG4-PTX with homologous PTX-domains of the human aGPCR members ADGRG6 (UniProt Accession Number: Q86SQ4-1), ADGRD1 (Q6QNK2-1), ADGRD2 (Q7Z7M1-1), a blue box highlights a conserved patch of surface residues. Bottom: ADGRG4-PTX (view onto B face) with highlighted residues of high (red) and medium (orange) sequence consensus. Blue arrows indicate a conserved patch at the flank of the structure with a core “PEL” motif.

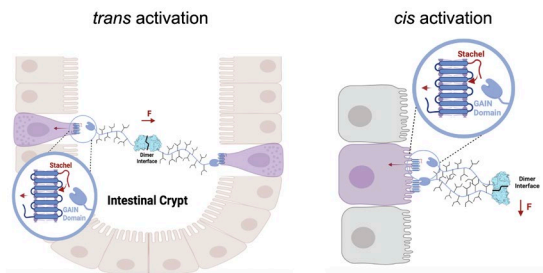

Fig. 10 Scheme of hypothetical homophilic trans and cis interaction of ADGRG4 in an intestinal crypt. AGDRG4 may form trans dimers via homophilic PTX interaction. Upon bowl movements or cell proliferation-mediated changes in the cell-cell distances forces ( $F =$  force) may emerge at the homodimer that are conducted to the GAIN domain (blue-colored domain) via the stalk. This leads to the exposition of the Stachel to activate the 7TM. Black branches at the stalk indicate its high amount of glycosylation. In a cis interaction between ADGRG4 expressed in the same cell, shear forces my lead to receptor activation. Created with BioRender.com.

A

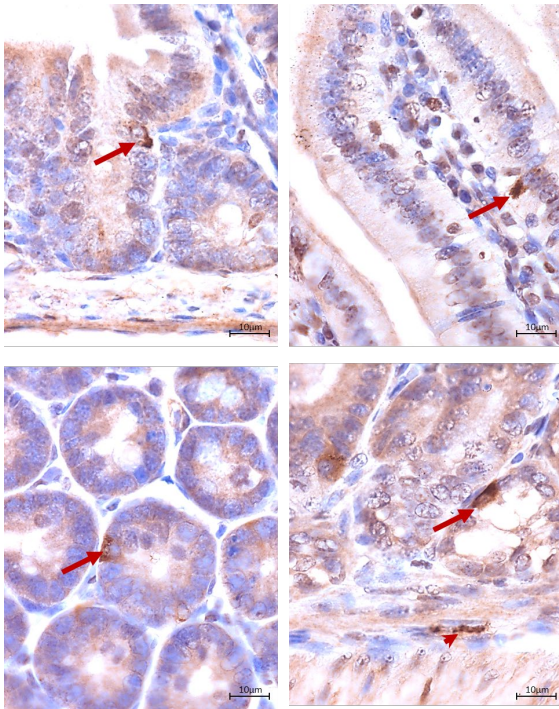

B

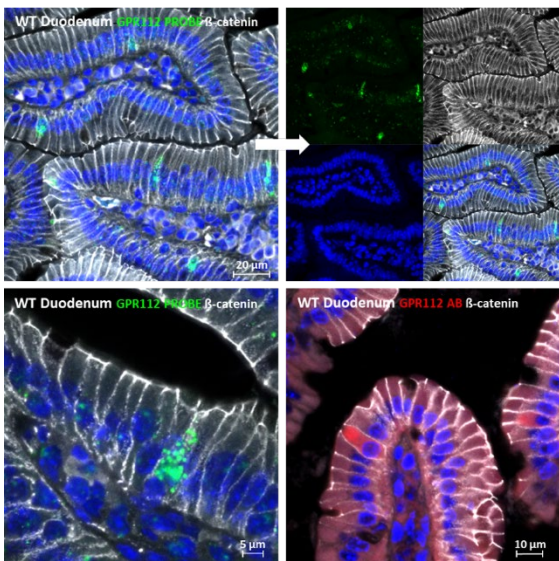

Fig. 11 Detection of ADGRG4 protein and mRNA in small intestinal tissue. Immunohistochemical detection of ADGRG4 positive cells in small intestinal epithelium (arrows) and underlying layers (arrowhead) A). Detection of ADGRG4-mRNA (green, FISH) or ADGRG4-protein (red, IF) positive cells in small intestinal epithelium highlighted by IF-β-catenin (white) and DAPI-nuclear staining (blue) B).

## References

- Ainavarapu SRK, Brujic J, Huang HH, Wiita AP, Lu H, Li L, Walther KA, Carrion-Vazquez M, Li H, Fernandez JM, 2007. Contour length and refolding rate of a small protein controlled by engineered disulfide bonds. *Biophysical journal*, 92 (1), 225–233.
- Araç D, Boucard AA, Bolliger MF, Nguyen J, Soltis SM, Südhof TC, Brunger AT, 2012. A novel evolutionarily conserved domain of

- cell-adhesion GPCRs mediates autoprolysis. *The EMBO journal*, 31 (6), 1364–1378.
- Ashton AW, Boehm MK, Gallimore JR, Pepys MB, Perkins SJ, 1997. Pentameric and decameric structures in solution of serum amyloid P component by X-ray and neutron scattering and molecular modelling analyses. *Journal of molecular biology*, 272 (3), 408–422.
- Bisswanger H, 2017. *Enzyme kinetics. Principles and methods (Third, enlarged and improved edition)*. Wiley-VCH, Weinheim, Germany, 316 p.
- Bistoletti M, Bosi A, Banfi D, Giaroni C, Baj A, 2020. The microbiota-gut-brain axis: Focus on the fundamental communication pathways. *Progress in molecular biology and translational science*, 176, 43–110.
- Blanchet CE, Spilotros A, Schwemmer F, Graewert MA, Kikhney A, Jeffries CM, Franke D, Mark D, Zengerle R, Cipriani F, Fiedler S, Roessle M, Svergun DI, 2015. Versatile sample environments and automation for biological solution X-ray scattering experiments at the P12 beamline (PETRA III, DESY). *Journal of Applied Crystallography*, 48 (Pt 2), 431–443.
- Bocchinfuso WP, Hammond GL, 1994. Steroid-binding and dimerization domains of human sex hormone-binding globulin partially overlap: steroids and Ca<sup>2+</sup> stabilize dimer formation. *Biochemistry*, 33 (35), 10622–10629.
- Chen X, Liu H, Shim AHR, Focia PJ, He X, 2008. Structural basis for synaptic adhesion mediated by neuroligin-neurexin interactions. *Nature structural & molecular biology*, 15 (1), 50–56.
- Dempsey CE, Bigotti MG, Adams JC, Brancaccio A, 2019. Analysis of  $\alpha$ -Dystroglycan/LG Domain Binding Modes: Investigating Protein Motifs That Regulate the Affinity of Isolated LG Domains. *Frontiers in molecular biosciences*, 6, 18.
- Ding W-Q, Cheng Z-J, McElhiney J, Kuntz SM, Miller LJ, 2002. Silencing of secretin receptor function by dimerization with a misspliced variant secretin receptor in ductal pancreatic adenocarcinoma. *Cancer research*, 62 (18), 5223–5229.
- Emsley P, Lohkamp B, Scott WG, Cowtan K, 2010. Features and development of Coot. *Acta crystallographica. Section D, Biological crystallography*, 66 (Pt 4), 486–501.
- Felsenstein J, 1985. CONFIDENCE LIMITS ON PHYLOGENIES: AN APPROACH USING THE BOOTSTRAP. *Evolution; international journal of organic evolution*, 39 (4), 783–791.
- Franke D, Kikhney AG, Svergun DI, 2012. Automated acquisition and analysis of small angle X-ray scattering data. *Nuclear Instruments and Methods in Physics Research Section A: Accelerators, Spectrometers, Detectors and Associated Equipment*, 689, 52–59.
- Franzén O, Gan L-M, Björkegren JLM, 2019. PanglaoDB: a web server for exploration of mouse and human single-cell RNA sequencing data. *Database : the journal of biological databases and curation*, 2019.
- Fredriksson R, Lagerström MC, Höglund PJ, Schiöth HB, 2002. Novel human G protein-coupled receptors with long N-terminals containing GPS domains and Ser/Thr-rich regions. *FEBS Letters*, 531 (3), 407–414.
- Garcia-Boronat M, Diez-Rivero CM, Reinherz EL, Reche PA, 2008. PVS: a web server for protein sequence variability analysis tuned to facilitate conserved epitope discovery. *Nucleic acids research*, 36 (Web Server issue), W35-41.
- Gerken TA, Butenhof KJ, Shogren R, 1989. Effects of glycosylation on the conformation and dynamics of O-linked glycoproteins: carbon-13 NMR studies of ovine submaxillary mucin. *Biochemistry*, 28 (13), 5536–5543.



- GRAEME-COOK F, 2009. Neuroendocrine Tumors of the GI Tract and Appendix. In: Surgical Pathology of the GI Tract, Liver, Biliary Tract, and Pancreas. Elsevier, p. 653–680.
- Grishkovskaya I, Avvakumov GV, Hammond GL, Muller YA, 2002. Resolution of a Disordered Region at the Entrance of the Human Sex Hormone-binding Globulin Steroid-binding Site. *Journal of molecular biology*, 318 (3), 621–626.
- Grishkovskaya I, Avvakumov GV, Sklenar G, Dales D, Hammond GL, Muller YA, 2000. Crystal structure of human sex hormone-binding globulin: steroid transport by a laminin G-like domain. *The EMBO journal*, 19 (4), 504–512.
- Hamann J, Aust G, Araç D, Engel FB, Formstone C, Fredriksson R, Hall RA, Harty BL, Kirchhoff C, Knapp B, Krishnan A, Liebscher I, Lin H-H, Martinelli DC, Monk KR, Peeters MC, Piao X, Prömel S, Schöneberg T, Schwartz TW, Singer K, Stacey M, Ushkaryov YA, Vallon M, Wolfrum U, Wright MW, Xu L, Langenhan T, Schiöth HB, 2015. International Union of Basic and Clinical Pharmacology. XCIV. Adhesion G protein-coupled receptors. *Pharmacological reviews*, 67 (2), 338–367.
- Hohenester E, 2019. Laminin G-like domains: dystroglycan-specific lectins. *Current opinion in structural biology*, 56, 56–63.
- Hohenester E, Tisi D, Talts JF, Timpl R, 1999. The Crystal Structure of a Laminin G-like Module Reveals the Molecular Basis of  $\alpha$ -Dystroglycan Binding to Laminins, Perlecan, and Agrin. *Molecular Cell*, 4 (5), 783–792.
- Hohenester E, Yurchenco PD, 2013. Laminins in basement membrane assembly. *Cell adhesion & migration*, 7 (1), 56–63.
- Inforzato A, Riviaccio V, Morreale AP, Bastone A, Salustri A, Scarchilli L, Verdoliva A, Vincenti S, Gallo G, Chiapparino C, Pacello L, Nucera E, Serlupi-Crescenzi O, Day AJ, Bottazzi B, Mantovani A, Santis R de, Salvatori G, 2008. Structural characterization of PTX3 disulfide bond network and its multimeric status in cumulus matrix organization. *The Journal of biological chemistry*, 283 (15), 10147–10161.
- Ito J, Ito M, Nambu H, Fujikawa T, Tanaka K, Iwaasa H, Tokita S, 2009. Anatomical and histological profiling of orphan G-protein-coupled receptor expression in gastrointestinal tract of C57BL/6J mice. *Cell and tissue research*, 338 (2), 257–269.
- Jones DT, Taylor WR, Thornton JM, 1992. The rapid generation of mutation data matrices from protein sequences. *Computer applications in the biosciences : CABIOS*, 8 (3), 275–282.
- Jumper J, Evans R, Pritzel A, Green T, Figurnov M, Ronneberger O, Tunyasuvunakool K, Bates R, Žídek A, Potapenko A, Bridgland A, Meyer C, Kohl SAA, Ballard AJ, Cowie A, Romera-Paredes B, Nikolov S, Jain R, Adler J, Back T, Petersen S, Reiman D, Clancy E, Zielinski M, Steinegger M, Pacholska M, Berghammer T, Bodenstein S, Silver D, Vinyals O, Senior AW, Kavukcuoglu K, Kohli P, Hassabis D, 2021. Highly accurate protein structure prediction with AlphaFold. *Nature*, 596 (7873), 583–589.
- Kirkpatrick LL, Matzuk MM, Dodds DC, Perin MS, 2000. Biochemical interactions of the neuronal pentraxins. Neuronal pentraxin (NP) receptor binds to taipoxin and taipoxin-associated calcium-binding protein 49 via NP1 and NP2. *The Journal of biological chemistry*, 275 (23), 17786–17792.
- Konarev PV, Volkov VV, Sokolova AV, Koch MHJ, Svergun DI, 2003. PRIMUS : a Windows PC-based system for small-angle scattering data analysis. *Journal of Applied Crystallography*, 36 (5), 1277–1282.
- Krissinel E, Henrick K, 2004. Secondary-structure matching (SSM), a new tool for fast protein structure alignment in three dimensions. *Acta crystallographica*.



- Section D, Biological crystallography, 60 (Pt 12 Pt 1), 2256–2268.
- Le BV, Kim H, Choi J, Kim J-H, Hahn M-J, Lee C, Kim KK, Hwang H-Y, 2011. Crystal structure of the LG3 domain of endorepellin, an angiogenesis inhibitor. *Journal of molecular biology*, 414 (2), 231–242.
- Leaver-Fay A, Tyka M, Lewis SM, Lange OF, Thompson J, Jacak R, Kaufman K, Renfrew PD, Smith CA, Sheffler W, Davis IW, Cooper S, Treuille A, Mandell DJ, Richter F, Ban Y-EA, Fleishman SJ, Corn JE, Kim DE, Lyskov S, Berrondo M, Mentzer S, Popović Z, Havranek JJ, Karanicolas J, Das R, Meiler J, Kortemme T, Gray JJ, Kuhlman B, Baker D, Bradley P, 2011. ROSETTA3: an object-oriented software suite for the simulation and design of macromolecules. *Methods in enzymology*, 487, 545–574.
- Leja J, Essaghir A, Essand M, Wester K, Oberg K, Tötterman TH, Lloyd R, Vasmatzis G, Demoulin J-B, Giandomenico V, 2009. Novel markers for enterochromaffin cells and gastrointestinal neuroendocrine carcinomas. *Modern pathology : an official journal of the United States and Canadian Academy of Pathology, Inc*, 22 (2), 261–272.
- Leon K, Cunningham RL, Riback JA, Feldman E, Li J, Sosnick TR, Zhao M, Monk KR, Araç D, 2020. Structural basis for adhesion G protein-coupled receptor Gpr126 function. *Nature communications*, 11 (1), 194.
- Liebscher I, Schöneberg T, 2016. Tethered Agonism: A Common Activation Mechanism of Adhesion GPCRs. *Handbook of experimental pharmacology*, 234, 111–125.
- Liebscher I, Schöneberg T, Thor D, 2022. Stachel-mediated activation of adhesion G protein-coupled receptors: insights from cryo-EM studies. *Signal transduction and targeted therapy*, 7 (1), 227.
- Liebschner D, Afonine PV, Baker ML, Bunkóczi G, Chen VB, Croll TI, Hintze B, Hung LW, Jain S, McCoy AJ, Moriarty NW, Oeffner RD, Poon BK, Prisant MG, Read RJ, Richardson JS, Richardson DC, Sammito MD, Sobolev OV, Stockwell DH, Terwilliger TC, Urzhumtsev AG, Videau LL, Williams CJ, Adams PD, 2019. Macromolecular structure determination using X-rays, neutrons and electrons: recent developments in Phenix. *Acta crystallographica. Section D, Structural biology*, 75 (Pt 10), 861–877.
- Lum AM, Wang BB, Beck-Engeser GB, Li L, Channa N, Wabl M, 2010. Orphan receptor GPR110, an oncogene overexpressed in lung and prostate cancer. *BMC cancer*, 10, 40.
- Malaker SA, Riley NM, Shon DJ, Pedram K, Krishnan V, Dorigo O, Bertozzi CR, 2022. Revealing the human mucinome. *Nature communications*, 13 (1), 3542.
- McCoy AJ, Grosse-Kunstleve RW, Adams PD, Winn MD, Storoni LC, Read RJ, 2007. Phaser crystallographic software. *Journal of Applied Crystallography*, 40 (Pt 4), 658–674.
- McGuckin WF, McKenzie BF, 1958. An Improved Periodic Acid Fuchsin Sulfite Staining Method for Evaluation of Glycoproteins. *Clinical Chemistry*, 4 (6), 476–483.
- Milligan G, Ward RJ, Marsango S, 2019. GPCR homo-oligomerization. *Current opinion in cell biology*, 57, 40–47.
- Mirdita M, Schütze K, Moriwaki Y, Heo L, Ovchinnikov S, Steinegger M, 2021. ColabFold - Making protein folding accessible to all.
- Missler M, Südhof TC, 1998. Neurexins: Three genes and 1001 products. *Trends in Genetics*, 14 (1), 20–26.
- Møller TC, Hottin J, Clerté C, Zwier JM, Durroux T, Rondard P, Prézeau L, Royer CA, Pin J-P, Margeat E, Kniazeff J, 2018. Oligomerization of a G protein-coupled receptor in neurons controlled by its structural dynamics. *Scientific reports*, 8 (1), 10414.

- Ng HKH, Chow BKC, 2015. Oligomerization of Family B GPCRs: Exploration in Inter-Family Oligomer Formation. *Frontiers in endocrinology*, 6, 10.
- Nishimura T, Honda H, Takeichi M, 2012. Planar cell polarity links axes of spatial dynamics in neural-tube closure. *Cell*, 149 (5), 1084–1097.
- Notredame C, Higgins DG, Heringa J, 2000. T-Coffee: A novel method for fast and accurate multiple sequence alignment. *Journal of molecular biology*, 302 (1), 205–217.
- Paavola KJ, Stephenson JR, Ritter SL, Alter SP, Hall RA, 2011. The N terminus of the adhesion G protein-coupled receptor GPR56 controls receptor signaling activity. *The Journal of biological chemistry*, 286 (33), 28914–28921.
- Pelaseyed T, Zäch M, Petersson AC, Svensson F, Johansson DGA, Hansson GC, 2013. Unfolding dynamics of the mucin SEA domain probed by force spectroscopy suggest that it acts as a cell-protective device. *The FEBS journal*, 280 (6), 1491–1501.
- Pepys MB, 2018. The Pentraxins 1975-2018: Serendipity, Diagnostics and Drugs. *Frontiers in immunology*, 9, 2382.
- Pepys MB, Dash AC, Ashley MJ, 1977. Isolation of C-reactive protein by affinity chromatography. *Clinical and experimental immunology*, 30 (1), 32–37.
- Perelson AS, 1992. *Theoretical and Experimental Insights into Immunology*. Springer Berlin / Heidelberg, Berlin, Heidelberg, 485 p.
- Perkins JR, Diboun I, Dessailly BH, Lees JG, Orengo C, 2010. Transient protein-protein interactions: structural, functional, and network properties. *Structure (London, England : 1993)*, 18 (10), 1233–1243.
- Petersen SC, Luo R, Liebscher I, Giera S, Jeong S-J, Mogha A, Ghidinelli M, Feltri ML, Schöneberg T, Piao X, Monk KR, 2015. The adhesion GPCR GPR126 has distinct, domain-dependent functions in Schwann cell development mediated by interaction with laminin-211. *Neuron*, 85 (4), 755–769.
- Round P, Das S, Wu T-S, Wähälä K, van Petegem F, Hammond GL, 2020. Molecular interactions between sex hormone-binding globulin and nonsteroidal ligands that enhance androgen activity. *The Journal of biological chemistry*, 295 (5), 1202–1211.
- Rudenko G, Hohenester E, Muller YA, 2001. LG/LNS domains: multiple functions – one business end? *Trends in Biochemical Sciences*, 26 (6), 363–368.
- Salzman GS, Ackerman SD, Ding C, Koide A, Leon K, Luo R, Stoveken HM, Fernandez CG, Tall GG, Piao X, Monk KR, Koide S, Araç D, 2016. Structural Basis for Regulation of GPR56/ADGRG1 by Its Alternatively Spliced Extracellular Domains. *Neuron*, 91 (6), 1292–1304.
- Scholz N, Guan C, Nieberler M, Grotemeyer A, Maiellaro I, Gao S, Beck S, Pawlak M, Sauer M, Asan E, Rothemund S, Winkler J, Prömel S, Nagel G, Langenhan T, Kittel RJ, 2017. Mechano-dependent signaling by Latrophilin/CIRL quenches cAMP in proprioceptive neurons. *eLife*, 6.
- Schöneberg T, Kleinau G, Brüser A, 2016. What are they waiting for?-Tethered agonism in G protein-coupled receptors. *Pharmacological research*, 108, 9–15.
- Schöneberg T, Liebscher I, 2021. Mutations in G Protein-Coupled Receptors: Mechanisms, Pathophysiology and Potential Therapeutic Approaches. *Pharmacological reviews*, 73 (1), 89–119.
- Shannon CE, 1948. *A Mathematical Theory of Communication*. Bell System Technical Journal, 27 (3), 379–423.
- Shima Y, Kawaguchi S, Kosaka K, Nakayama M, Hoshino M, Nabeshima Y, Hirano T, Uemura T, 2007. Opposing roles in neurite growth control by two seven-pass

- transmembrane cadherins. *Nature neuroscience*, 10 (8), 963–969.
- Sparta KM, Krug M, Heinemann U, Mueller U, Weiss MS, 2016. XDSAPP2.0. *Journal of Applied Crystallography*, 49 (3), 1085–1092.
- Stecher G, Tamura K, Kumar S, 2020. Molecular Evolutionary Genetics Analysis (MEGA) for macOS. *Molecular biology and evolution*, 37 (4), 1237–1239.
- Stetefeld J, Alexandrescu AT, Maciejewski MW, Jenny M, Rathgeb-Szabo K, Schulthess T, Landwehr R, Frank S, Ruegg MA, Kammerer RA, 2004. Modulation of agrin function by alternative splicing and Ca<sup>2+</sup> binding. *Structure (London, England : 1993)*, 12 (3), 503–515.
- Suzuki K, Elegheert J, Song I, Sasakura H, Senkov O, Matsuda K, Kakegawa W, Clayton AJ, Chang VT, Ferrer-Ferrer M, Miura E, Kaushik R, Ikeno M, Morioka Y, Takeuchi Y, Shimada T, Otsuka S, Stoyanov S, Watanabe M, Takeuchi K, Dityatev A, Aricescu AR, Yuzaki M, 2020. A synthetic synaptic organizer protein restores glutamatergic neuronal circuits. *Science (New York, N.Y.)*, 369 (6507).
- Tamura K, Stecher G, Kumar S, 2021. MEGA11: Molecular Evolutionary Genetics Analysis Version 11. *Molecular biology and evolution*, 38 (7), 3022–3027.
- Usui T, Shima Y, Shimada Y, Hirano S, Burgess RW, Schwarz TL, Takeichi M, Uemura T, 1999. Flamingo, a Seven-Pass Transmembrane Cadherin, Regulates Planar Cell Polarity under the Control of Frizzled. *Cell*, 98 (5), 585–595.
- Walsh SM, Mathiasen S, Christensen SM, Fay JF, King C, Provasi D, Borrero E, Rasmussen SGF, Fung JJ, Filizola M, Hristova K, Kobilka B, Farrens DL, Stamou D, 2018. Single Proteoliposome High-Content Analysis Reveals Differences in the Homo-Oligomerization of GPCRs. *Biophysical journal*, 115 (2), 300–312.
- Ward Y, Lake R, Martin PL, Killian K, Salerno P, Wang T, Meltzer P, Merino M, Cheng S, Santoro M, Garcia-Rostan G, Kelly K, 2013. CD97 amplifies LPA receptor signaling and promotes thyroid cancer progression in a mouse model. *Oncogene*, 32 (22), 2726–2738.
- Ward Y, Lake R, Yin JJ, Heger CD, Raffeld M, Goldsmith PK, Merino M, Kelly K, 2011. LPA receptor heterodimerizes with CD97 to amplify LPA-initiated RHO-dependent signaling and invasion in prostate cancer cells. *Cancer research*, 71 (23), 7301–7311.
- Wilde C, Fischer L, Lede V, Kirchberger J, Rothmund S, Schöneberg T, Liebscher I, 2016. The constitutive activity of the adhesion GPCR GPR114/ADGRG5 is mediated by its tethered agonist. *FASEB journal : official publication of the Federation of American Societies for Experimental Biology*, 30 (2), 666–673.
- Wittlake A, Prömel S, Schöneberg T, 2021. The Evolutionary History of Vertebrate Adhesion GPCRs and Its Implication on Their Classification. *International Journal of Molecular Sciences*, 22 (21), 11803.
- Xiao P, Guo S, Wen X, He Q-T, Lin H, Huang S-M, Gou L, Zhang C, Yang Z, Zhong Y-N, Yang C-C, Li Y, Gong Z, Tao X-N, Yang Z-S, Lu Y, Li S-L, He J-Y, Wang C, Zhang L, Kong L, Sun J-P, Yu X, 2022. Tethered peptide activation mechanism of the adhesion GPCRs ADGRG2 and ADGRG4. *Nature*, 604 (7907), 771–778.
- Yeung J, Adili R, Stringham EN, Luo R, Vizurraga A, Rosselli-Murai LK, Stoveken HM, Yu M, Piao X, Holinstat M, Tall GG, 2020. GPR56/ADGRG1 is a platelet collagen-responsive GPCR and hemostatic sensor of shear force. *Proceedings of the National Academy of Sciences of the United States of America*, 117 (45), 28275–28286.
- Zacharius RM, Zell TE, Morrison JH, Woodlock JJ, 1969. Glycoprotein staining following

electrophoresis on acrylamide gels.

Analytical Biochemistry, 30 (1), 148–152.

Zheng H, Chruszcz M, Lasota P, Lebioda L,  
Minor W, 2008. Data mining of metal ion  
environments present in protein  
structures. Journal of inorganic  
biochemistry, 102 (9), 1765–1776.
